# Supplementary material for: Chaotropic anion induced self-assembly of naphthalimide–glutathione nanohybrids: selective recognition of bisulphate anions in aqueous medium
Source: Royal Society of Chemistry journal article supplement (doi:10.1039/d3nj03912a), 2023-01-01
Supplement: d3nj03912a1.pdf [file d3nj03912a1.pdf]

### *Supporting Information*

#### **Chaotropic Anion Induced Self Assembly of Naphthalimide – Glutathione Nanohybrid: Selective recognition of bisulphate anion in aqueous medium**

Amanpreet Singh,<sup>a,b#</sup> Monika Chaudhary,<sup>c#</sup> Meenakshi Verma,<sup>d</sup> Navneet Kaur<sup>e\*</sup> and Narinder Singh<sup>a\*</sup>

<sup>a</sup> Department of Chemistry, Indian Institute of Technology Ropar, Roopnagar, Punjab-140001, India.

<sup>b</sup> Department of Chemistry, University Institute of Science, Chandigarh University, Mohali, Punjab- 140413, India.

<sup>c</sup> Department for Biomedical Engineering, Indian Institute of Technology Ropar, Roopnagar, Punjab-140001, India.

<sup>d</sup> Department of UCRD, Department of Chemistry, Chandigarh University, Mohali, - 140413, India.

<sup>e</sup> Department of Chemistry, Panjab University, Chandigarh – 160014, India.

*# These authors contributed equally to this work*

Email: [nsingh@iitrpr.ac.in](mailto:nsingh@iitrpr.ac.in); [navneetkaur@pu.ac.in](mailto:navneetkaur@pu.ac.in)

#### **Table of Contents**

|                                                                                                                                                                |
|----------------------------------------------------------------------------------------------------------------------------------------------------------------|
| <b>Figure S1.</b> <sup>1</sup> H NMR spectrum of <b>compound 1</b> .                                                                                           |
| <b>Figure S2.</b> <sup>13</sup> C NMR spectrum of <b>compound 1</b> .                                                                                          |
| <b>Figure S3.</b> <sup>1</sup> H NMR spectrum of <b>compound 2</b> .                                                                                           |
| <b>Figure S4.</b> <sup>13</sup> C NMR spectrum of <b>compound 2</b> .                                                                                          |
| <b>Figure S5.</b> <sup>1</sup> H NMR spectrum of <b>compound 3</b> .                                                                                           |
| <b>Figure S6.</b> <sup>13</sup> C NMR spectrum of <b>compound 3</b> .                                                                                          |
| <b>Figure S7.</b> DLS histogram of the nano – aggregates of host upon binding with the bisulphate anions.                                                      |
| <b>Figure S8.</b> Fluorescence profile of Nanohybrid in 10%, 20%, 30%, 40%, 50%, 60%, 70%, 80% and 90% H <sub>2</sub> O fraction mixture with THF.             |
| <b>Figure S9.</b> FT-IR spectrum of compound-1; NH-1 and NH-1 on addition of bisulphate anion.                                                                 |
| <b>Figure S10.</b> pH effect on the self-assembly                                                                                                              |
| <b>Figure S11.</b> Salt effect on the self-assembly                                                                                                            |
| <b>Figure S12.</b> Zeta potential measurements of organic nanoparticles (ONPs); nanohybrid (NH-1) and NH-1 on addition of bisulphate (repeated in triplicate). |

|                                                                                                                                               |
|-----------------------------------------------------------------------------------------------------------------------------------------------|
| <b>Figure S13.</b> PXRD spectrum of NH-1 on addition of bisulphate anion.                                                                     |
| <b>Figure S14.</b> Effect of various anions on UV-visible absorption profile of NH-1.                                                         |
| <b>Table S1:</b> Comparison table of our bisulphate ion sensor with the previously reported literature                                        |
| <b>Table S2:</b> Quantum yield studies                                                                                                        |
| <b>Table S3:</b> Comparison of developed method with the turbidity method reported in the literature for the estimation of $\text{HSO}_4^-$ . |

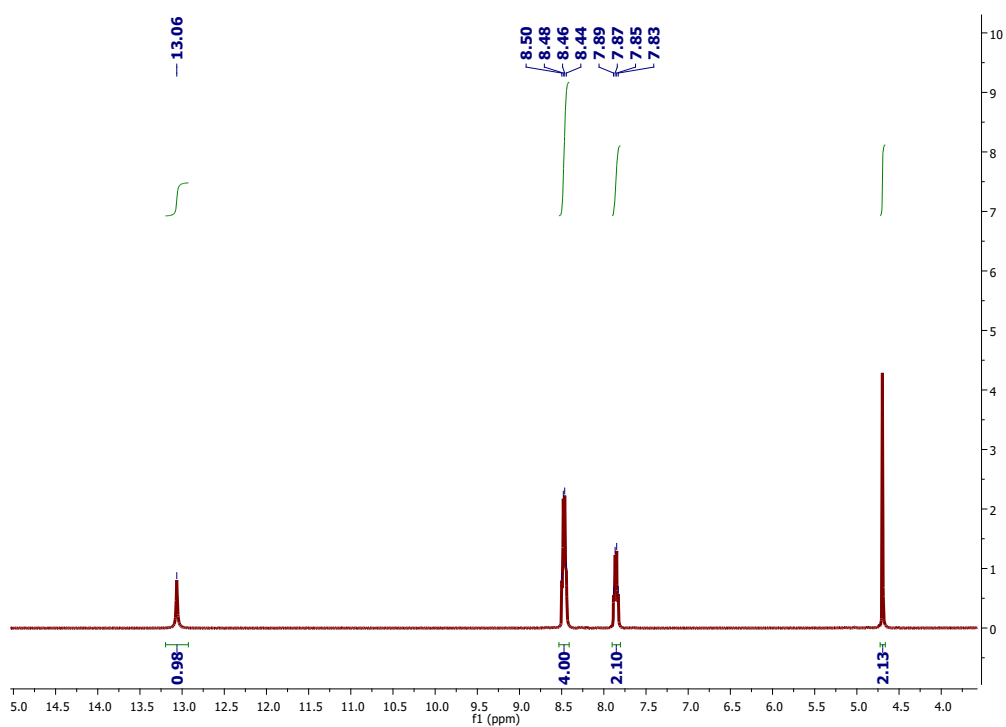

**Figure S1.**  $^1\text{H}$  NMR spectrum of compound 1.

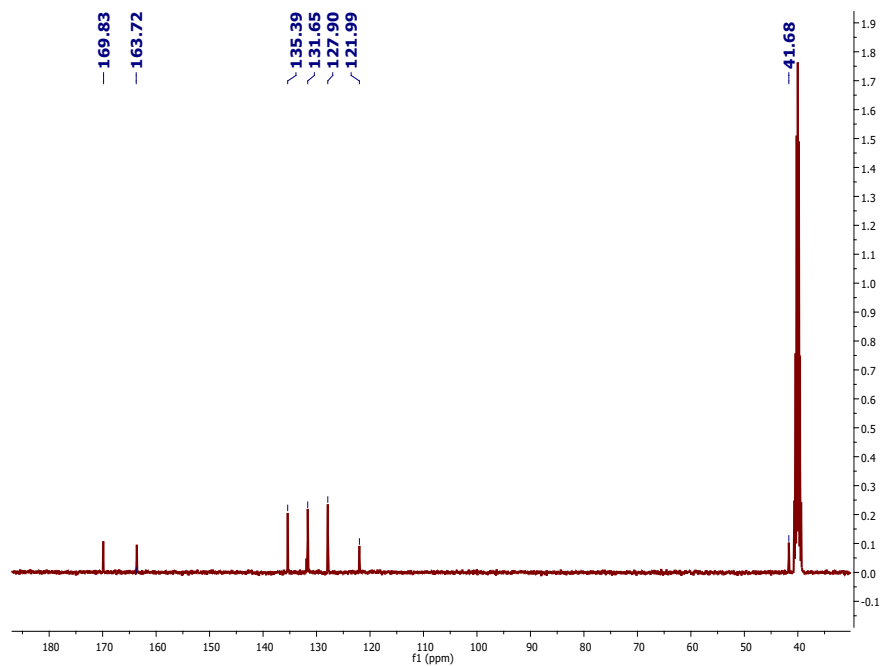

**Figure S2.**  $^{13}\text{C}$  NMR spectrum of **compound 1**.

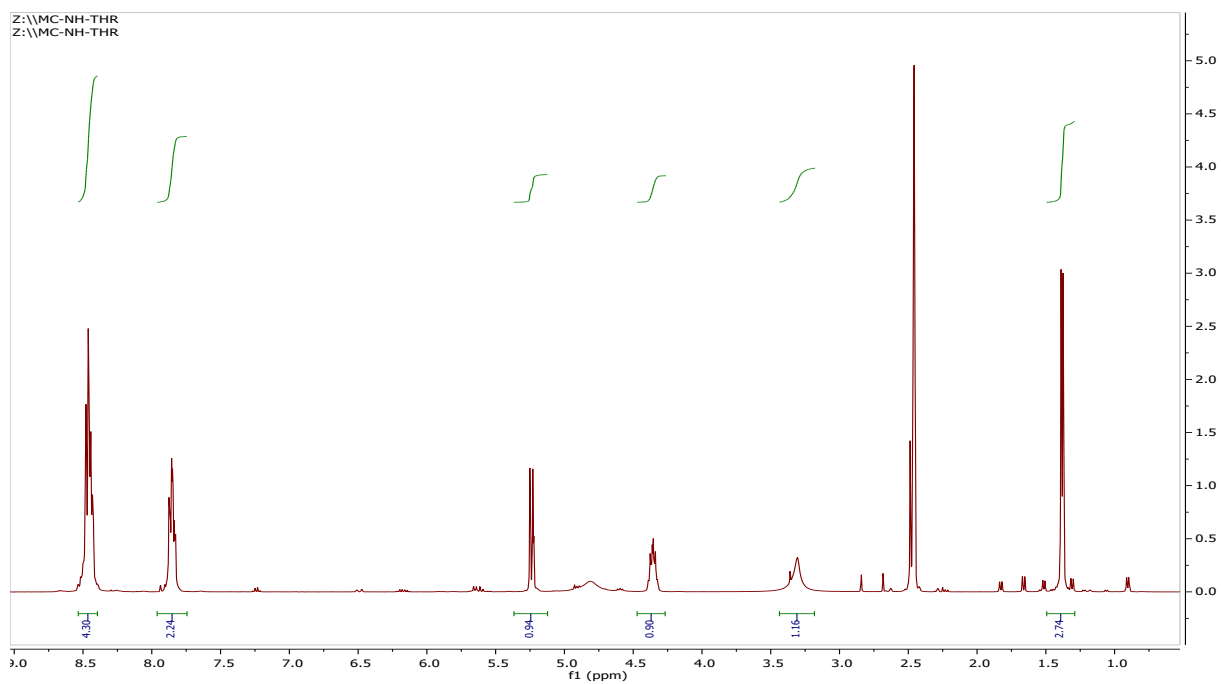

**Figure S3.**  $^1\text{H}$  NMR spectrum of **compound 2**.

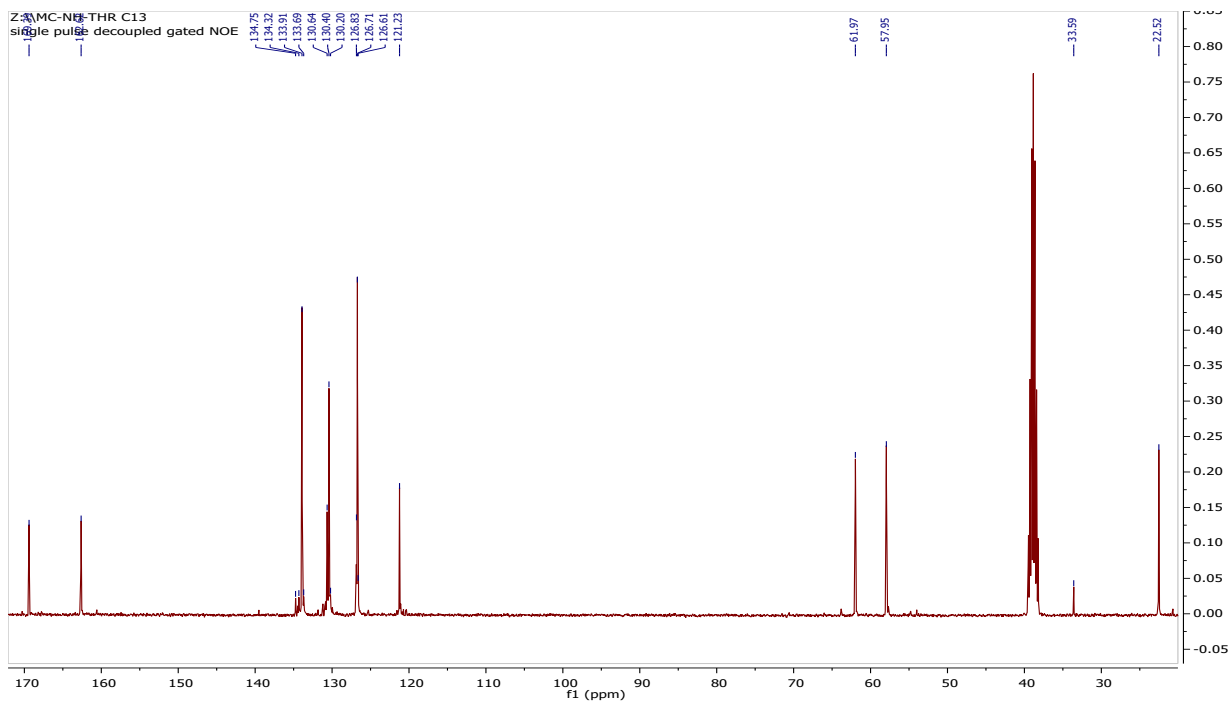

Figure S4.  $^{13}\text{C}$  NMR spectrum of compound 2.

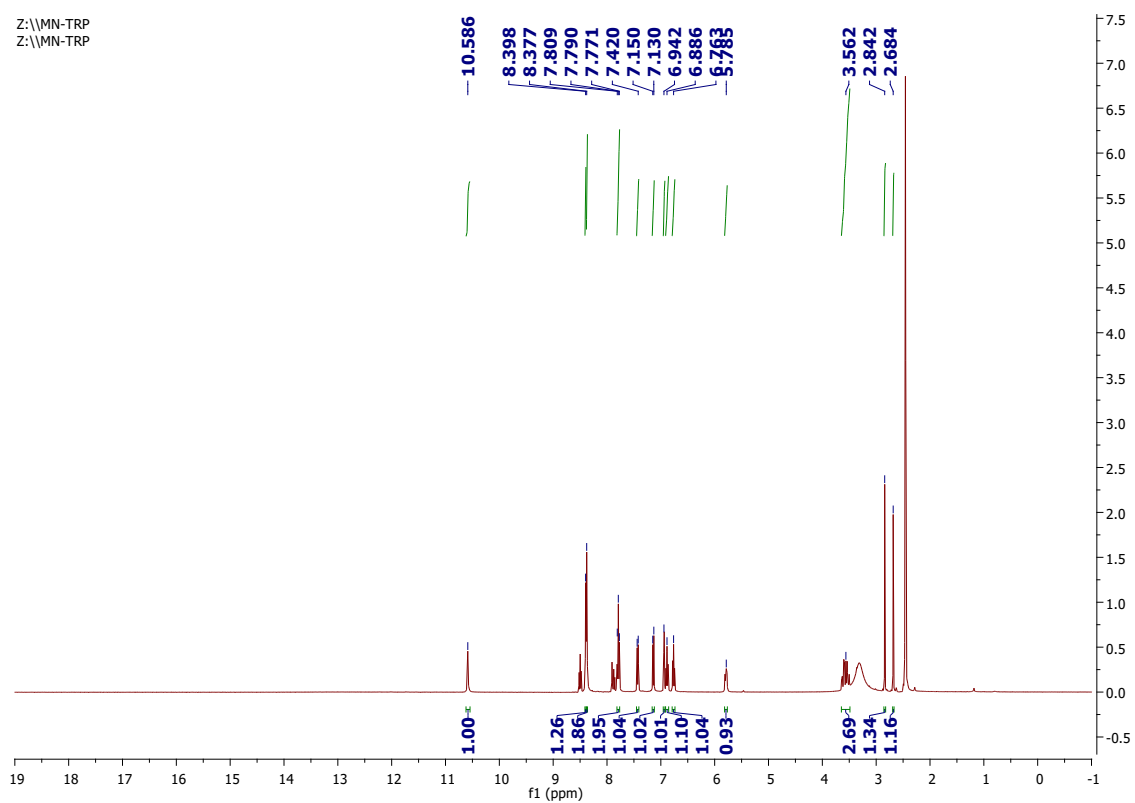

Figure S5.  $^1\text{H}$  NMR spectrum of compound 3.

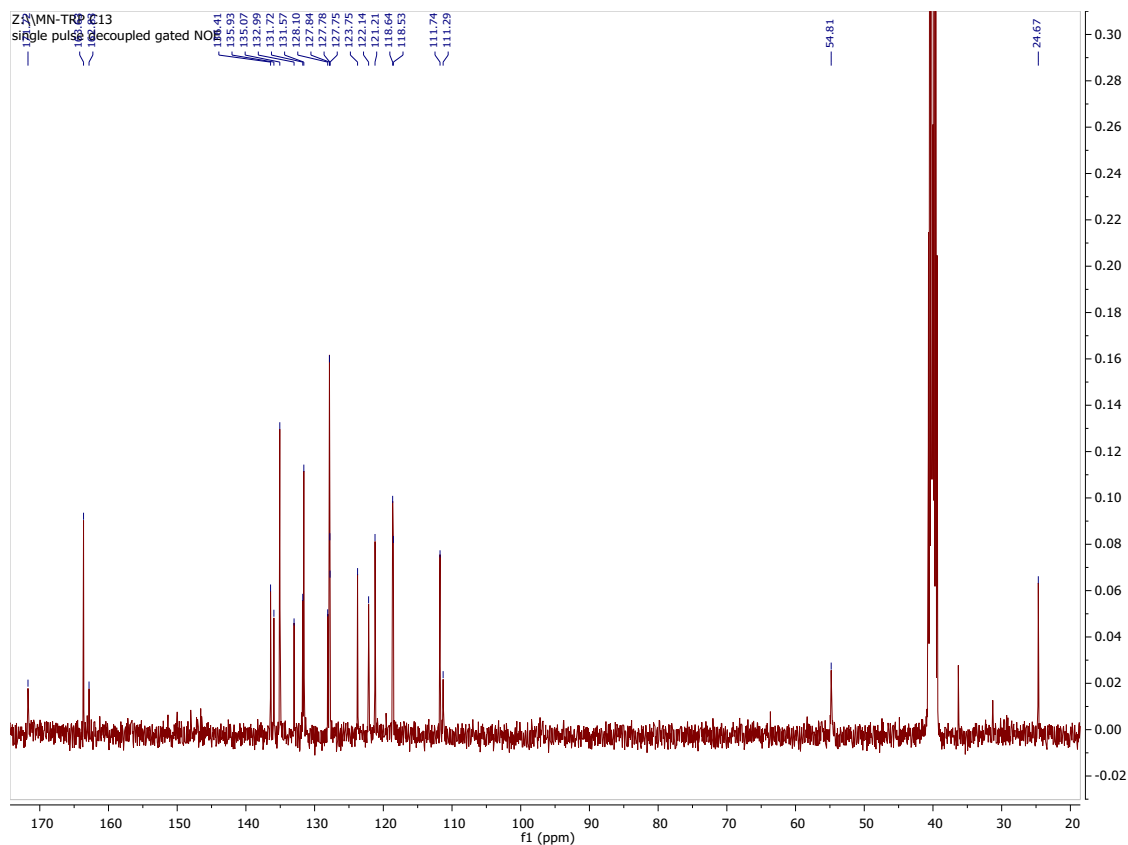

**Figure S6.**  $^{13}\text{C}$  NMR spectrum of **compound 3**.

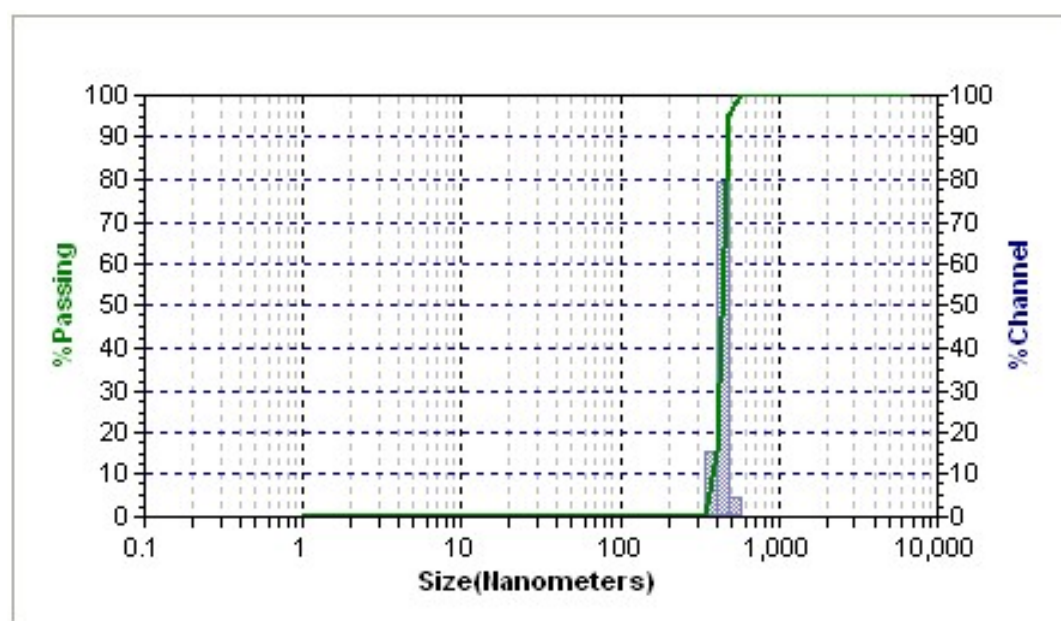

**Figure S7.** DLS histogram of the nano – aggregates of host (NH-1) upon binding with the bisulphate anions.

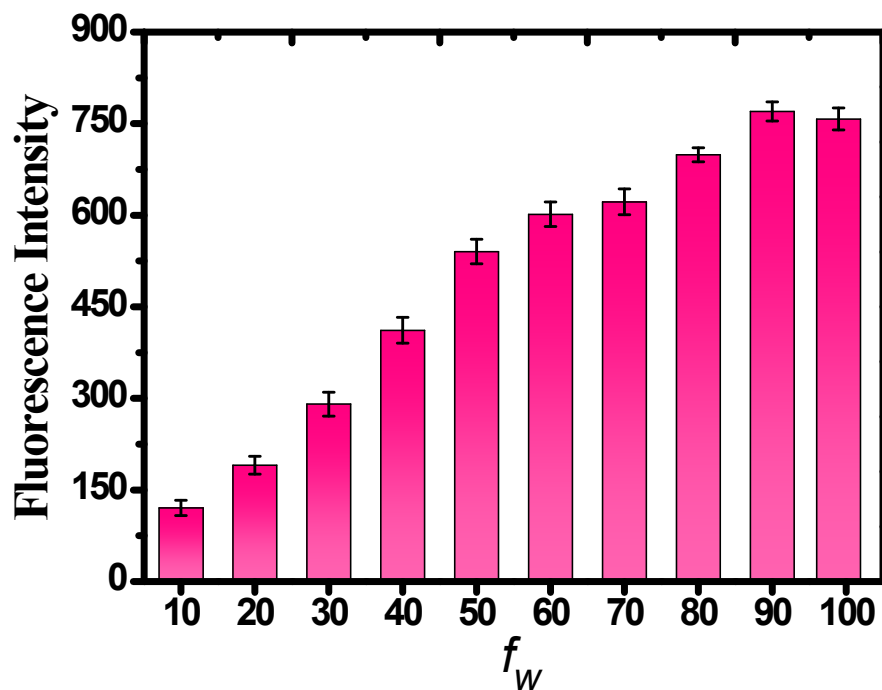

**Figure S8.** Fluorescence profile of NanoHybrid in 10%, 20%, 30%, 40%, 50%, 60%, 70%, 80% and 90% H<sub>2</sub>O fraction mixture with THF (performed in triplicate).

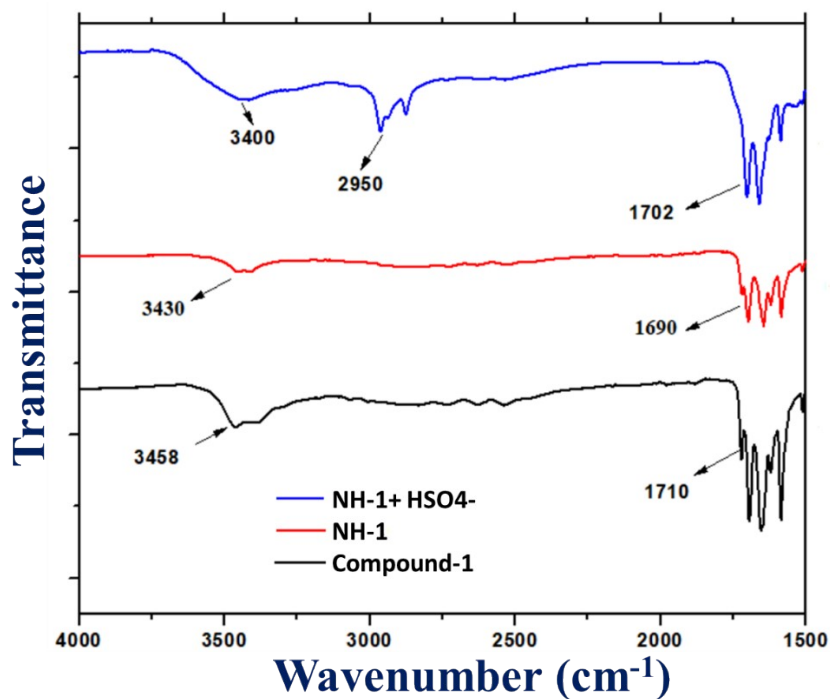

**Figure S9:** FT-IR spectrum of compound-1; NH-1 and NH-1 on addition of bisulphate anion.

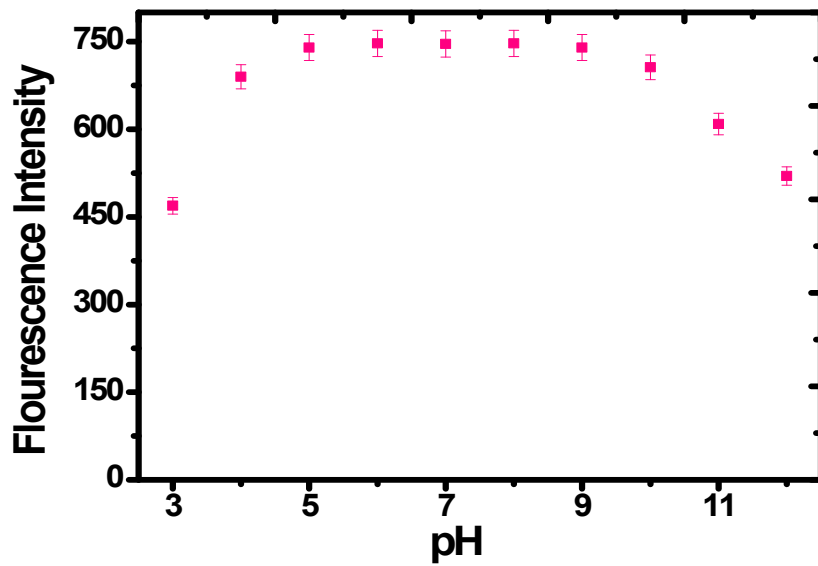

Figure S10. pH effect on the self-assembly (performed in triplicate).

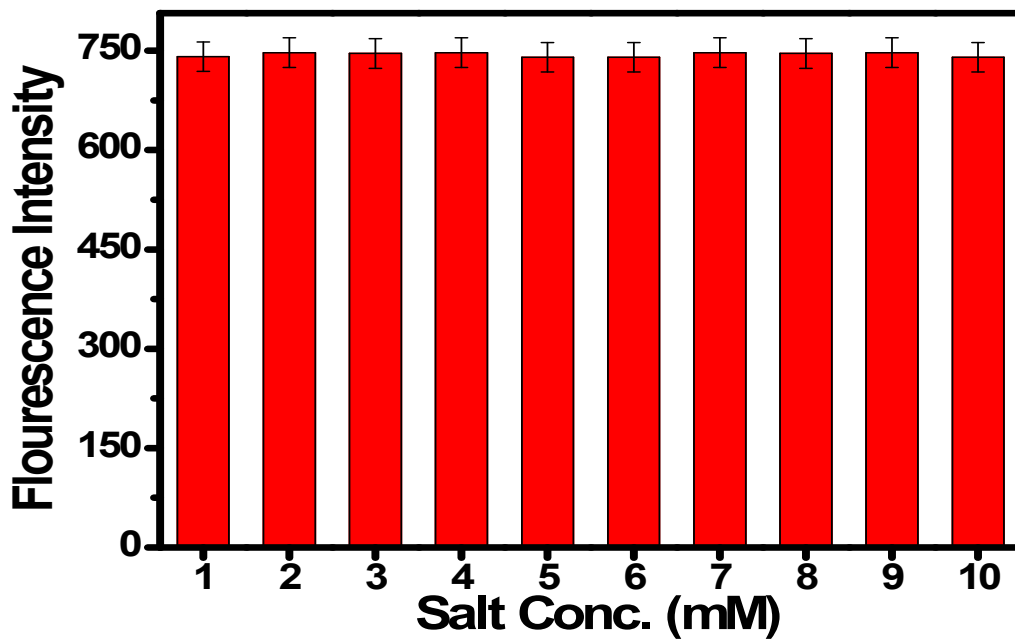

Figure S11. Salt effect on the self-assembly (performed in triplicate).

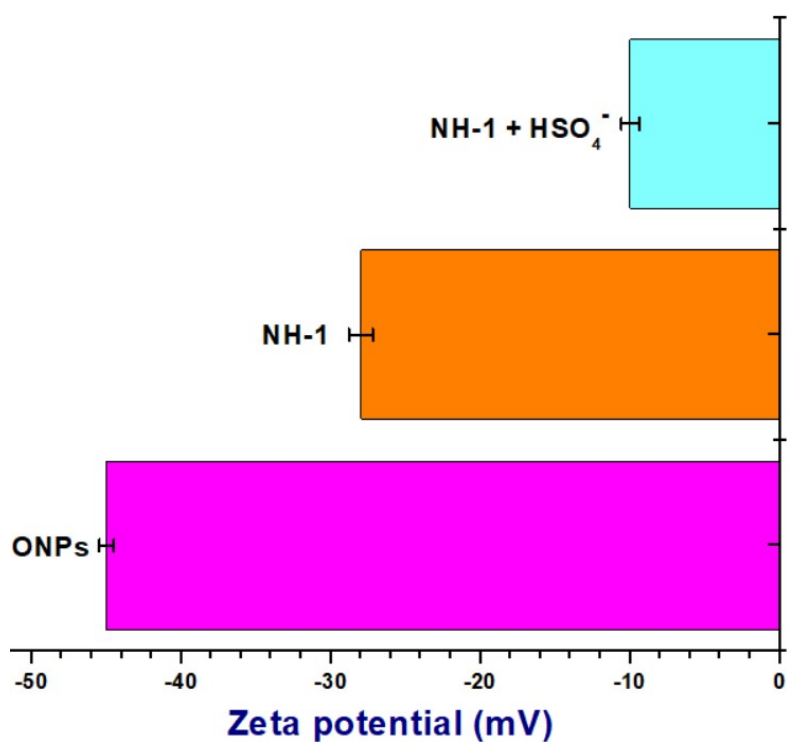

**Figure S12:** Zeta potential measurements of organic nanoparticles (ONPs); nanohybrid (NH-1) and NH-1 on addition of bisulphate (repeated in triplicate).

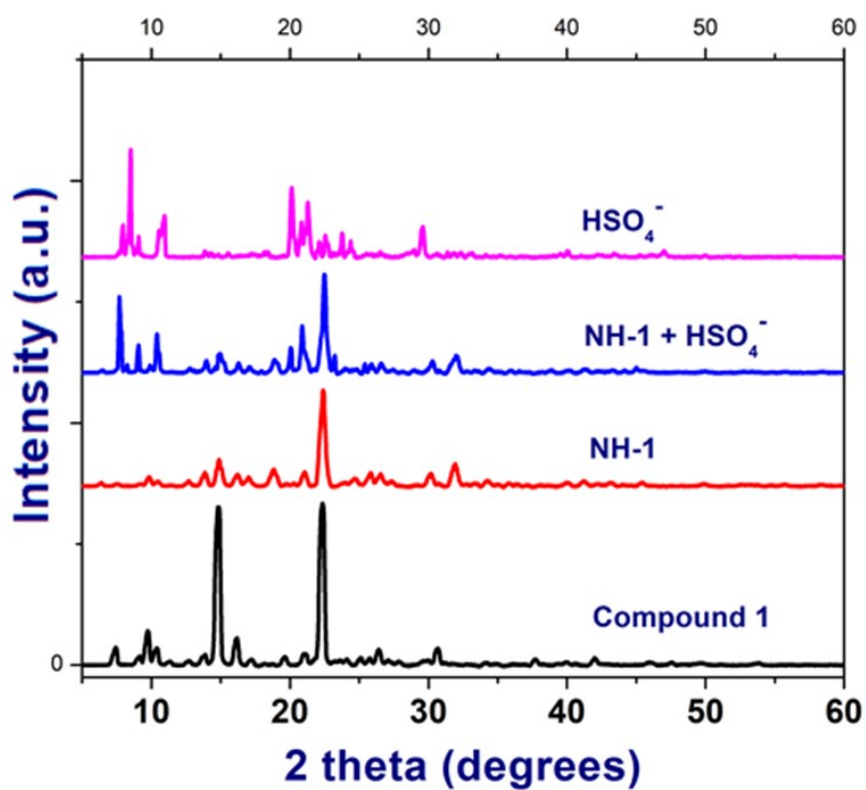

**Figure S13:** PXRD spectrum of NH-1 on addition of bisulphate anion.



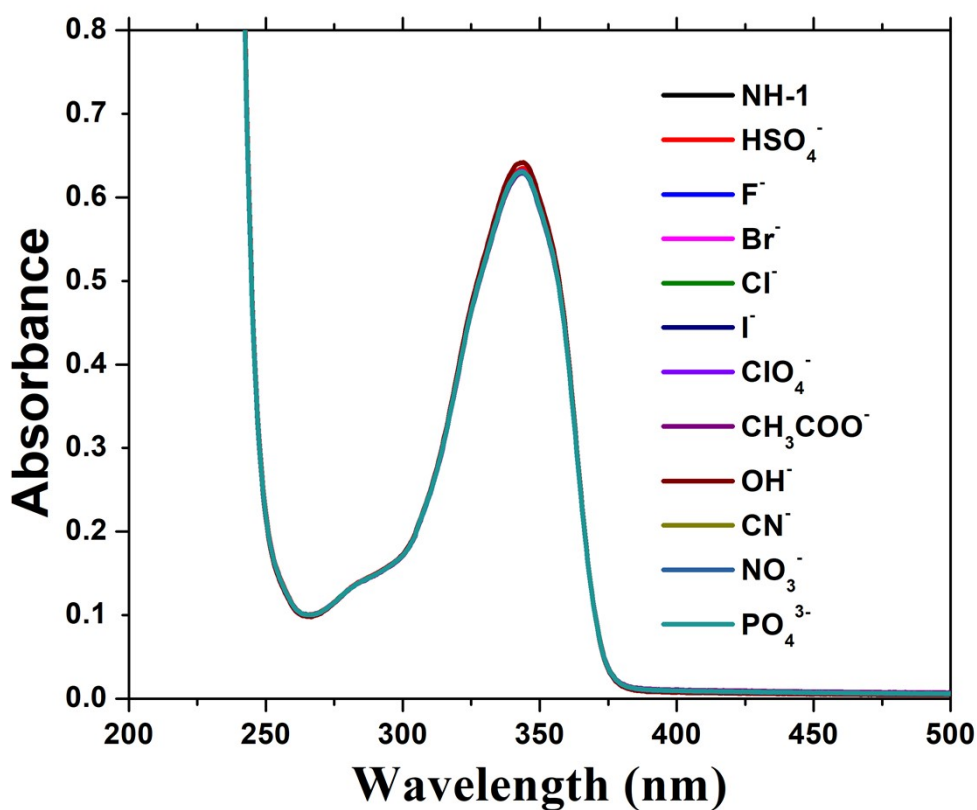

**Figure S14:** Effect of various anions on UV-visible absorption profile of NH-1.

**Table S1:** Comparison table of our bisulphate ion sensor with the previously reported literature.

| Sr. No. | Medium       | Technique Used | Detection Limit         | References                                |
|---------|--------------|----------------|-------------------------|-------------------------------------------|
| 1       | Aqueous      | Fluorescence   | 50 $\mu\text{M}$        | Inorg. Chem. <b>2011</b> , 50, 2953-2956  |
| 2       | Semi aqueous | Fluorescence   | $3.75 \times 10^{-6}$ M | Chem. Commun. <b>2009</b> , 7128-7130     |
| 3       | Aqueous      | Fluorescence   | 1.12 $\mu\text{M}$      | Anal. Methods. <b>2014</b> , 6, 9030-9036 |
| 4       | Aqueous      | Fluorescence   | 108 nM                  | RSC Adv. <b>2014</b> , 4, 48004-48011     |
| 5       | Ethanol      | Fluorescence   | 1.5 $\mu\text{M}$       | Inorg. Chem. <b>2013</b> , 52, 7487-      |

|           |                        |                                                      |                           |                                                 |
|-----------|------------------------|------------------------------------------------------|---------------------------|-------------------------------------------------|
|           |                        |                                                      |                           | 7496.                                           |
| 6         | Aqueous                | Fluorescence                                         | $5 \times 10^{-6}$ M      | J. Mater. Chem. B. <b>2013</b> , 1, 5014-5020   |
| 7         | Aqueous                | Optical and electrochemical                          | $3.18 \times 10^{-7}$ M   | RSC Adv. <b>2015</b> , 5, 50532-50539           |
| 8         | Aqueous                | Fluorescence                                         | 5.67 nM                   | Dalton Trans. <b>2015</b> , 44, 12589-12597     |
| 9         | ACN : H <sub>2</sub> O | UV- visible absorption spectroscopy and Fluorescence | $1.6067 \times 10^{-7}$ M | RSC Adv. <b>2016</b> , 6, 34376-34380.          |
| 10        | Aqueous                | UV-visible absorption                                | 5 nM                      | Tetrahedron Lett. <b>2019</b> , 60, 1457-1462   |
| 11        | Aqueous                | UV-visible absorption                                | $8.65 \times 10^{-7}$ M   | Inorg. Chem. Commun. <b>2022</b> , 139, 109966. |
| <b>12</b> | <b>Aqueous</b>         | <b>Fluorescence</b>                                  | <b>3 nM</b>               | <b>This work</b>                                |

**Table S2:** Quantum yield studies.

| S. No. | Compound                             | Quantum yield |
|--------|--------------------------------------|---------------|
| 1      | NH-1                                 | 0.15          |
| 2      | NH-1 + HSO <sub>4</sub> <sup>-</sup> | 0.42          |

The quantum yield (QY) of NH-1 was calculated with the following equation, where 'NH-1' and 'st' corresponds to the nanohybrid of **compound 1** sample and reference standard, QS (quinine sulphate), respectively. The QY ( $\Phi$ ) of QS in 0.1 M H<sub>2</sub>SO<sub>4</sub> is determined to be 54%.

$$\Phi(\text{nanohybrid}) = \Phi_{\text{st}} \cdot \left( \frac{A_{\text{st}}}{A_{\text{nanohybrid}}} \right) \cdot \left( \frac{F_{\text{nanohybrid}}}{F_{\text{st}}} \right) \cdot \left( \frac{\eta^2_{\text{nanohybrid}}}{\eta^2_{\text{st}}} \right)$$

Where:

$\Phi_{\text{nanohybrid}}$  = quantum yield of nanohybrid

$\Phi_{\text{st}}$  = quantum yield of standard

$F_{\text{nanohybrid}}$  = Fluorescence intensity of nanohybrid

$F_{\text{st}}$  = Fluorescence intensity of standard

$\eta$  = refractive index

**Table S3:** Comparison of developed method with the turbidity method reported in the literature for the estimation of HSO<sub>4</sub><sup>-</sup>.

| S. No. | Sample Name | Concentration of HSO <sub>4</sub> <sup>-</sup> added | Percentage recovery<br>(This work) | Percentage recovery<br>(Turbidimetry) |
|--------|-------------|------------------------------------------------------|------------------------------------|---------------------------------------|
| 1      | S1          | 14 nM                                                | 95.8%                              | 93.4%                                 |
| 2      | S2          | 25 nM                                                | 98.7%                              | 95.8%                                 |
| 3      | S3          | 16 nM                                                | 95.8%                              | 93.6%                                 |
